# Supplementary material
Source: PubMed Central journal article supplement (PMC3857729)
Supplement: NIHMS488727-supplement-supplement_1.pdf [file NIHMS488727-supplement-supplement_1.pdf]

---

 Supplemental Table 1. Psychosis Symptoms Assessed in Childhood and Adulthood
 

---



---

**Childhood (age 11) Psychosis Symptoms**


---

1. Some people believe in mind reading or being psychic. Have other people ever read your mind?
  2. Have you ever had messages sent just to you through television or radio?
  3. Have you ever thought that people are following you or spying on you?
  4. Have you heard voices other people can't hear?
- 

---

**Adulthood (ages 21-38) Psychosis Symptoms**


---

1. Have you believed that someone was plotting against you or trying to hurt or poison you?
  2. Have you believed that someone was spying on you?
  3. Have you believed that you could hear what another person was thinking, even though they were not speaking?
  4. Have you believed that a person, power, or force could control your movements or thoughts against your will?
  5. Have you felt that someone took your thoughts out of your mind?
  6. Have you believed that you were being sent special messages through the television or radio, or that a program, song or news story had been made just for you?
  7. Have you experienced hearing things or hearing voices that other people cannot hear?
  8. Have you had unusual feelings inside or on your body, like being touched when there was nothing there, or feeling as if something was moving inside your body?
- 

Note. Childhood psychosis symptoms were scored either '0' = no; '1' = yes, likely; and '2' = yes, definitely. Adulthood psychosis symptoms were scored either '0' = no or '1' = yes, experienced this symptom.

Supplemental Figure 1. A brief history of the vascular hypothesis of schizophrenia.

## A Brief History of the Vascular Hypothesis of Schizophrenia

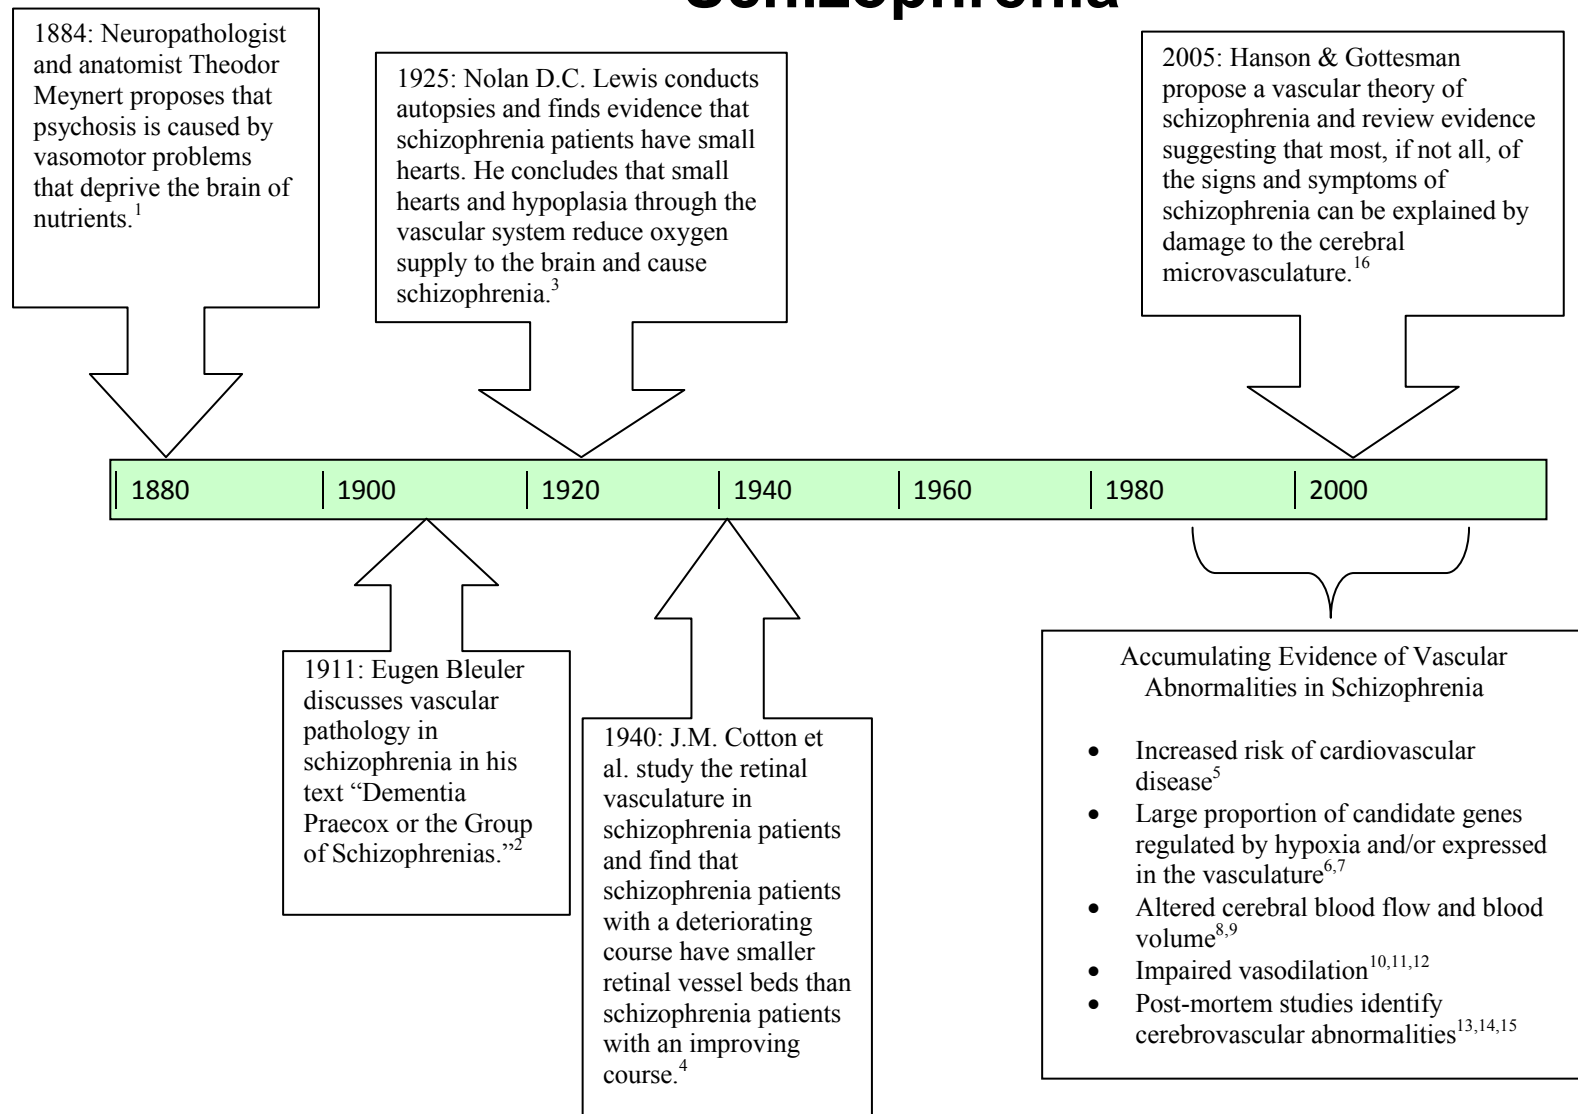

## References for Supplemental Figure 1

1. Meynert T. Klinik der erkrankungen des vorderhirns. Wien: Braumüller 1884.
2. Bleuler E. Dementia praecox or the group of schizophrenias. New York: International University Press; 1911.
3. Lewis NDC: Comments on the pathology of dementia praecox. *Journal of Nervous and Mental Disease* 1925;62(3):225-60.
4. Cotton JM, Lewis NDC, Egenhofer AW: Vascular bed of the retina in mental disease. *Arch Neuro Psychiatr* 1940;43(5):891-900.
5. Hennekens CH, Hennekens AR, Hollar D, Casey DE: Schizophrenia and increased risks of cardiovascular disease. *Am Heart J* 2005;150(6):1115-21.
6. Schmidt-Kastner R, van Os J, Steinbusch HWM, Schmitz C: Gene regulation by hypoxia and the neurodevelopmental origin of schizophrenia. *Schizophr Res* 2006;84(2-3):253-71.
7. Schmidt-Kastner R, van Os J, Esquivel G, Steinbusch HW, Rutten BP: An environmental analysis of genes associated with schizophrenia: Hypoxia and vascular factors as interacting elements in the neurodevelopmental model. *Mol Psychiatry* 2012;17(12):1194-205.
8. Bachneff SA: Regional cerebral blood flow in schizophrenia and the local circuit neurons hypothesis. *Schizophrenia Bull* 1996;22(1):163-82.
9. Cohen BM, Yurgeluntodd D, English CD, Renshaw PF: Abnormalities of regional distribution of cerebral vasculature in schizophrenia detected by dynamic susceptibility contrast mri. *Am J Psychiat* 1995;152(12):1801-3.
10. Ward PE, Sutherland J, Glen EMT, Glen AIM: Niacin skin flush in schizophrenia: A preliminary report. *Schizophr Res* 1998;29(3):269-74.

11. Lien YJ, Huang SS, Liu CM, Hwu HG, Faraone SV, Tsuang MT, Chen WJ: A genome-wide quantitative linkage scan of niacin skin flush response in families with schizophrenia. *Schizophrenia Bull* 2013;39(1):68-76.
12. Hudson CJ, Lin A, Cogan S, Cashman F, Warsh JJ: The niacin challenge test: Clinical manifestation of altered transmembrane signal transduction in schizophrenia? *Biol Psychiatry* 1997;41(5):507-13.
13. Senitz D, Winkelmann E: [neuronal structure abnormality in the orbito-frontal cortex of schizophrenics]. *Journal fur Hirnforschung* 1991;32(2):149-58.
14. Uranova NA, Zimina IS, Vikhрева OV, Krukov NO, Rachmanova VI, Orlovskaya DD: Ultrastructural damage of capillaries in the neocortex in schizophrenia. *World J Biol Psychia* 2010;11(3):567-78.
15. Harris LW, Wayland M, Lan M, Ryan M, Giger T, Lockstone H, Wuethrich I, Mimmack M, Wang L, Kotter M, Craddock R, Bahn S: The cerebral microvasculature in schizophrenia: A laser capture microdissection study. *Plos One* 2008;3(12).
16. Hanson DR, Gottesman II: Theories of schizophrenia: A genetic-inflammatory-vascular synthesis. *Bmc Med Genet* 2005;6.
